# Supplementary material
Source: PubMed Central journal article supplement (PMC3190791)
Supplement: supp_M111.260968_jbc.M111.260968-1.pdf [file supp_M111.260968_jbc.M111.260968-1.pdf]

**Supplemental Table 1.** Sequences of mutagenic primers used in this study. The underlined bases represent mutations.

| Oligonucleotide    | Sequence (5' → 3')                                             | Ref |
|--------------------|----------------------------------------------------------------|-----|
| NuoL-1             | ACAAGCGCCAGGATCTGGTTTACGAG                                     |     |
| NuoL-13            | CCGGCAGCCAGCCATGCAGCGGAAC                                      |     |
| NuoL-R(BglII)      | GCACCAGGTTAAAAC <u>Ag</u> aTcTTAAAGTCGCCTACCG                  | (1) |
| NuoL-F(BglII)      | CGCTTTGCAGGTAAAG <u>a</u> TCTGCTGTTAAGTGAG                     | (1) |
| NuoL(G488STOP)-For | CGACGGAAGTGGCGCA <u>C</u> tGaAGCATGTTGACCCTGGAAATTACC          |     |
| NuoL(G488STOP)-Rev | GGTAATTTCCAGGGTCAACATGCTtCaGTGCGCCAGTTCCGTCG                   |     |
| NuoL(T517STOP)-For | GCTGTGGCTGGGTAAACGTT <u>a</u> aCTGGTGACCTCCATCG                |     |
| NuoL(T517STOP)-Rev | CGATGGAGGTCACCAGt <u>t</u> aACGTTTACCCAGCCACAGC                |     |
| NuoL(W593STOP)-For | GTGAGAACGGCTATCTGCGCTGaTATGTGGCATCCATGAGCATCG                  |     |
| NuoL(W593STOP)-Rev | CGATGCTCATGGATGCCACATAaCAGCGCAGATAGCCGTTCTCAC                  |     |
| NuoL(A607STOP)-For | GGTGCGGTCGTGGTGCTGt <u>a</u> ACTGTTGATGGTACTGCGTTGAG           |     |
| NuoL(A607STOP)-Rev | CTCAACGCAGTACCATCAACAGTt <u>a</u> CAGCACCACGACCCGACC           |     |
| NuoL(V611STOP)-For | GGTGCTGGCACTGTTGATGt <u>a</u> ACTGCGTTGAGTTAAGGATTGTGG         |     |
| NuoL(V611STOP)-Rev | CCACAATCCTTAACTCAACGCAGTt <u>a</u> CATCAACAGTGCCAGCACC         |     |
| NuoL(L612STOP)-For | GTGCTGGCACTGTTGATGGT <u>a</u> aaCGTTGAGTTAAGGATTGTGGG          |     |
| NuoL(L612STOP)-Rev | CCCACAATCCTTAACTCAACGt <u>t</u> aTACCATCAACAGTGCCAGCAC         |     |
| NuoL(V519KpnI)-For | GGCTGGGTAAACGTA <u>C</u> TCTGGg <u>t</u> ACCTCCATCGCCAACAGTGCG |     |
| NuoL(V519KpnI)-Rev | CGCACTGTTGGCGATGGAGGt <u>c</u> ACCAGAGTACGTTTACCCAGCC          |     |
| NuoL(K581KpnI)-For | CGCTTTGCAGGTAAAGGt <u>acc</u> CTGTTAAGTGAGAACGGC               |     |
| NuoL(K581KpnI)-Rev | GCCGTTTCTCACTTAAACAGg <u>gt</u> ACCTTTACCTGCAAAGCG             |     |
| NuoM-A             | CAGG <u>CC</u> CGGGATGCGGCGATTTTCCACTTG                        | (2) |
| NuoM-B             | CGCGGAAGCTTCGGCATGTGCAATTCAGACTGC                              | (2) |
| NuoM-C             | GTCGCTAAGCTTTGCGGTGGCAACGCTTGGGATG                             | (2) |
| NuoM-D             | CGCGTCGACGCTGCTGAACAGATAACCG                                   | (2) |
| NuoM-J             | GTCGCCACGCAATGGAGAGCATCACAACC                                  | (2) |
| NuoM-M             | CCGGTCCTGACGGGACTTTTACAAGG                                     | (2) |
| spc-E2             | GGGTCAAAGCTT <u>C</u> AGTGGAAACGAAAACCTCAC                     | (2) |
| spc-F2             | GGAAGATAAGCTTTCTATTTTTCAATAGTTACAAATTG                         | (2) |
| NuoM(N502STOP)-For | CCAGCAGTGGTTTGT <u>T</u> TAATCCGTTACTACTACAAGGC                |     |
| NuoM(N502STOP)-Rev | GCCTTGTAGTAGTAACGGATTAAACAAACCACTGCTGG                         |     |
| NuoM(N495STOP)-For | CCTCGCACTCCGCGATTGGCTAAATCCAGCAGTGG                            |     |
| NuoM(N495STOP)-Rev | CCACTGCTGGATTTAGCCAATCGCGGAGTGCGAGG                            |     |
| NuoM(I485STOP)-For | GGCTTCTATCCGCAGCCGTA <u>A</u> ACTGGATACCTCGC                   |     |
| NuoM(I485STOP)-Rev | GCGAGGTATCCAGTTACGGCTGCGGATAGAAGCC                             |     |
| NuoM(M467STOP)-For | GCTGCGTGAGCTGTTTTAGATCCTGTTGCTGGTGG                            |     |
| NuoM(M467STOP)-Rev | CCACCAGCAACAGGATCTAAAACAGCTCACGCAGC                            |     |
| NuoM(G459STOP)-For | GCCAGGAAGTGCATAGATGTCGCTGCGTGAGC                               |     |
| NuoM(G459STOP)-Rev | GCTCACGCAGCGACATCTATGGCAGTTCCTGGC                              |     |

1. Nakamaru-Ogiso, E., Kao, M. C., Chen, H., Sinha, S. C., Yagi, T., and Ohnishi, T. (2010) *J. Biol. Chem.* **285**, 39070-39078
2. Torres-Bacete, J., Nakamaru-Ogiso, E., Matsuno-Yagi, A., and Yagi, T. (2007) *J. Biol. Chem.* **282**, 36914-36922
