# Supplementary material
Source: PubMed Central journal article supplement (PMC3190791)
Supplement: supp_M111.260968_jbc.M111.260968-2.pdf [file supp_M111.260968_jbc.M111.260968-2.pdf]

NuoLEcoli ---MNMLALTIILPLIGFVLLAFSRGRWSENVSAIVGVGSVGLAALVTAFIGVDFFANGE 57  
 Nqo12Thermus ---MALLG-TILLPLLLGFALLLGLFGKRMREPLPGVLASGLVLAFLGAGLLLSGG---- 52  
 Nqo12Paracoccus -----MEKFVLFAPLIASLIAGLGWRAIGEKAQYLTGGVLFSLISWYLFSLFDGVP- 54  
 NuoLRhodobacter -----MTTIIILLAPLLGALIGGGFWRLITEKGAIVVTTGLLFLSCILSWVFLTLPAET- 54  
 NuoLPseudomonas ---MNLLPLTFLFPLVGFLLLSFSRGRWSENLVGVGSVGLSALSAAWAIFSFHSSPP 57  
 NuoLStreptomyces --MENLIALLVAAPLLGAVVL-LCGRRLLDRVGHWIGTLLAAVSFVLGVVLFADLLGSGA 57  
 ND5Neurospora --MY---LSIIILPLLSIVAGFFGRKVGVSQAQLITCLSVIITGLAILAFFEVGFNNI 55  
 ND5Yarrowia --MYNAISLIIILPCISWLFPLFFGRQLGYVVFVTRMTSTLIIITTLITYYYFYQLLGN 58  
 ND5Bovine MNMFSLSLVTLTLLTTPIMMMSFNTYKPSNYPLYVKT-AISYAFITSMIPTMMFIHSGQ 59  
 ND5Human MTMHTTMTTLTTLTSLIPPILTTLVNPKNKNSYPHYVKS-IVASTFIISLFPPTTMFCLDQ 59

NuoLEcoli Q--TYSQPLWTWMSVGFNIGFNLVLDGLSLTMLS SVTVGVGFLIHMYASWYMRGEEG--- 112  
 Nqo12Thermus -----ARFQAEWLPG----IPFSLLLDNLSGFMLLIVTVGVGFLIHVYAIGYMGDDPG--- 100  
 Nqo12Paracoccus ----RHIPVLDWVVTGDFHAEWAIRLDRDLTAI MLIVVTVSALVHMYS LGYMAHDDNWTH 110  
 NuoLRhodobacter ----QHIIHLLDWIRSGALDTSWGI RLDRDLTAI MLIVVTVSALVHLYSWGYMAHDENWTH 110  
 NuoLPseudomonas EGGAYSLVLWQWMAAGDFSTNFTLYLDGLSVTMLGVVTVGVGFLIHLFASWYMRGETG--- 114  
 NuoLStreptomyces EDRTLTLQHLSWIPVEGFQADVAFRDLQLSMTFVLLITGVGSLIHLYSVAYMEHDERR-- 115  
 ND5Neurospora P---VTINLFRWIDSEWYNILWGFQFDSLTVAMLIPVLIISLVHIYSISYMSHDPHN-- 110  
 ND5Yarrowia P---INLELFNYLDINIDYLDINYNFEIDALTITMLLAITTISSMVHIYSISYMETDPH--- 112  
 ND5Bovine E---LIISNWHWLTIQTLKLSL SFKMDYFSMMFIPVALFVTWSIMEFSMWYMYSDPNIN- 115  
 ND5Human E---VIISNWHWATTQTTQLSLSFKLDYFSMMFIPVALFVTWSIMEFSLWYMNSDPNIN- 115

NuoLEcoli ----YSRFFAYTNLFIASMVVVLVADNLLMYLWGEVGLCSYLLIGFYITDPKNGAAM 168  
 Nqo12Thermus ----YSRFFAYFNLFIAMMLTLV LADSYPVMFIGWEGVGLASFLIGFWYKPNQYADSAR 156  
 Nqo12Paracoccus DEHYKARFFAYLSFFTFAMLMVLTADNLLQMFFGWEGVGVASYLLIGFYKKASANAAM 170  
 NuoLRhodobacter HEAYKARFFAYLSFFTFAMLMVLTSDNLVQMFFGWEGVGVASYLLIGFYKKPSANAAAI 170  
 NuoLPseudomonas ----YSRFFAYTNLFIASMLFLVLGDNLLFLYFGWEGVGLCSYLLIGFYYSNRNNGNAAL 170  
 NuoLStreptomyces -----RRFFGYLNLFLAAMLILVLADNYLLLYVWEGVGLAS YLLIGFWQHKPSAATAAK 170  
 ND5Neurospora -----QRFFSYLSLFTFMMIILV TANNYLLMFVWEGVGVCSYLLVSFWFTRIAANQSSM 165  
 ND5Yarrowia ----QVRFFSLLSMFTFMIIILV TGSNYFVLVFWGVEFIGVTSYLLISFWVTRLQAMKSAL 168  
 ND5Bovine -----KFFKYLLFLITMLILV TANNL FQLFIGWEGV GIMSFLLIGWYGRADANTAAL 169  
 ND5Human -----QFFKYLLIFLITMLILV TANNL FQLFIGWEGV GIMSFLLISWYARADANTAAI 169

NuoLEcoli KAFVVTRVGDVFLAFALFILIYNELGTLNFREMV-ELAPAHFADGN-----NMLMWATLM 221  
 Nqo12Thermus KAFIVNRIGDLGFMLGMAILWALYGTLSISELK-EAMEGPKLKNPD-----LLALAGLL 208  
 Nqo12Paracoccus KAFIVNRVGDGFLLGIFGIYWL TGSVQFDEIFRQVPQLAQTEIDFLWRDWNANLLGFL 230  
 NuoLRhodobacter KAFVVNRVGDGFALGIMGLFFLTDSIDMDVIFASAPELAKTELHFLAWEFNAANLLAVL 230  
 NuoLPseudomonas KAFIVTRVGDVFMAFGFLFILFQQFGTLNIQELL-VLAPQKFPEGN-----LWLTLATLA 223  
 NuoLStreptomyces KAFIVNRVGD MGLSIGIMLMFLWFGTFAFGPVLGGHGEAGLAAGADEG---KLTAIALM 226  
 ND5Neurospora SAFLTNRVGD CFLTIGMFVVLWTLGNLDYATVFS-----LAPYINSDIATIIGIC 215  
 ND5Yarrowia SAVLMNRFGDAFFVLGLCVIAYVFGTLNYSTIFATAYLIN-----TDLLVLIMLA 218  
 ND5Bovine QAILYNRIGDIGFILAMAWFLTNLNTWDLQQIFMLNPSDS-----NMPLIG 215  
 ND5Human QAILYNRIGDIGFILALAWFILHSNSWDPQQMALLNANPS-----LTPLLG 215

NuoLEcoli LLGGAVGKSAQLPLQ~~TW~~LADAMAGPTPV~~SAL~~IHAATMVTAGVYLIAR~~THGL~~FLMTPEVLH 281  
 Nqo12Thermus LFLGAVGKSAQIPLMVWLPDAMAGPTPV~~SAL~~IHAATMVTAGVYLIAR~~SSFL~~YSVLPDVS~~Y~~ 268  
 Nqo12Paracoccus L~~FV~~GAMGKSAQL~~LLHT~~WLPDAMEGPTPV~~SAL~~IHAATMVTAGVFLVCRMSPL~~YEF~~APDAKN 290  
 NuoLRhodobacter L~~FI~~GAMGKSAQL~~FLHT~~WLPDAMEGPTPV~~SAL~~IHAATMVTAGVFLVCRMSPL~~FEY~~APEAKM 290  
 NuoLPseudomonas LLGGAVGKSAQLPLQ~~TW~~LADAMAGPTPV~~SAL~~IHAATMVTAGVYLIAR~~CHGL~~F~~TL~~APDILE 283  
 NuoLStreptomyces LLLAA~~CG~~KSAQVPLQ~~SW~~LGDAMEGPTPV~~SAL~~IHAATMVTAGVYLI~~VR~~SGAIFNGAPDAQL 286  
 ND5Neurospora LLIGAMAKSSQVGLHVWLP~~MAME~~GPTPV~~SAL~~IHAATMVTAGVYLLMRSSPLIEYSSTVLL 275  
 ND5Yarrowia LFIAAMAKSAQFGLHNWLT~~LAME~~GPTPV~~SLL~~HAATLV~~TAGI~~YLLLR~~SAN~~ILEYTP~~TV~~LF 278  
 ND5Bovine LALAATGKSAQFGLHPWLP~~SAME~~GPTPV~~SALL~~HSSTMV~~VAGIF~~LLIRFYPL~~TENN~~KYIQS 275  
 ND5Human LLLAAAGKSAQLGLHPWLP~~SAME~~GPTPV~~SALL~~HSSTMV~~VAGIF~~LLIR~~FHPL~~AENSPLIQ~~T~~ 275

NuoLEcoli LVGIVGAVTLLLAGFAALVQ~~TD~~IKRVLAYSTMSQIGYMFLALGVQ--AWDA~~AI~~FHLMTHA 339  
 Nqo12Thermus AIAVVGLLTAAYGALS~~AF~~GQ~~TD~~IKKIVAYSTISQLGYMFLAAGVG--AYWV~~AL~~FHV~~F~~THA 326  
 Nqo12Paracoccus FIVII~~GAT~~TAF~~FAAT~~VGLVQ~~ND~~IKRVIAYSTCSQLGYMFVAAGVG--VYS~~AM~~FHLLTHA 348  
 NuoLRhodobacter MVVYVGAVTAF~~FAAT~~VGLVQ~~ND~~IKRVIAYSTCSQLGYMFVAAGSG--VYSV~~AM~~FHLLTHA 348  
 NuoLPseudomonas LVGIVGAVTLVL~~LAG~~FAALVQ~~TD~~IKRILAYSTMSQIGYMFLALGVQ--AWDA~~AI~~FHLMTHA 341  
 NuoLStreptomyces VVTIVGAVTLL~~FGA~~IVGCAKDDIKKALAGSTMSQIGY~~VLA~~AGLGP~~IGY~~VFAIMHLVTHG 346  
 ND5Neurospora LCLWLGAITTVFSSLIGL~~FQ~~DIKKVIAYSTMSQLGMMVIAIGLS--SYNV~~AL~~FHLINHA 333  
 ND5Yarrowia IILWIGALT~~TL~~SAGLIAICSN~~DL~~KRIIALSTMSQLGMMTIAIGLS--AYNL~~AL~~FHLLGHA 336  
 ND5Bovine ITLCLGAIT~~TL~~FTAMCALTQ~~ND~~IKKIIAFSTSSQLGLMMVTIGIN--QPYL~~AF~~LHIC~~THA~~ 333  
 ND5Human LTLCLGAIT~~TL~~FAAVCAL~~TQ~~NDIKKIVAFSTSSQLGLMMVTIGIN--QPHL~~AF~~LHIC~~THA~~ 333

NuoLEcoli FFKALLFLASGSVILACHH-EQNIFKMGG~~L~~RKSIPLVYL~~CFL~~VGGAALS--ALPLVTA-G 395  
 Nqo12Thermus FFKALLFLASGSVIHALGG-EQDVRKMGG~~L~~WKHL~~PQ~~TRW~~HAL~~IGALALG--GLPLLS--G 381  
 Nqo12Paracoccus FFKAMLFLGAGSVIHAMHH-EQDMRNYG~~L~~RKKI~~PL~~TFWAMMIGTF~~AIT~~GVGIPL-THLG 406  
 NuoLRhodobacter FFKAMLFLGAGSVIHAMHH-EQDMRNYG~~L~~RKKI~~P~~TFAIMMIG~~TL~~AITGVGIPFFSIGG 407  
 NuoLPseudomonas FFKALLFLASGAVIVACHH-EQNIFKMGG~~L~~WKKL~~PL~~AYAS~~SV~~VGGAALA--ALPFLTA-G 397  
 NuoLStreptomyces FFKAGLFLGAGSVMHGMND-EVDMRRY~~G~~L~~R~~KYMPVT~~FV~~TFGLGYLAI--GFPGLS--G 401  
 ND5Neurospora FYKALLFLGAGSVIHAVAD-NQDFRKF~~G~~L~~K~~NYL~~PL~~TYSVMLIASLSLV--AFPYMT--G 388  
 ND5Yarrowia FFKALLFMSAGSIIHSILNESQDIRTYG~~L~~LSYL~~P~~TYICITIASLSLM--AMPGLT--G 392  
 ND5Bovine FFKAMLFMCSGSIHSLND-EQDIRKMGG~~L~~FKAMP~~FT~~TALIVGSLALT--GMPFLT--G 388  
 ND5Human FFKAMLFMCSGSIHNLNN-EQDIRKMGG~~L~~LK~~TM~~PLTSTSLTIGSLALA--GMPFLT--G 388

NuoLEcoli -----FYSKDEILAGAMAN--GHINLMVAG--LVGAFM~~TS~~LYTFRMIFIVFHGKEQI- 443  
 Nqo12Thermus -----FWSKDAILAATLTYPFGGVGFYVGA--LLVAVLTAM~~Y~~AMRWFVLVFLGEERG- 431  
 Nqo12Paracoccus ----FAGFLSKDAIIESAYA-GSGYAFWLL----VIAACFTSFYSWRLIFLTFY~~G~~KPRG- 456  
 NuoLRhodobacter VPVGFAGYLSKDAIIESAFASGN~~G~~FAFYVL----VAAAGM~~TS~~SFYSWRLIFLTFYGEARG- 462  
 NuoLPseudomonas -----FYSKDEILWEAFAS--GHRELLIAG--LVGAFL~~TS~~IYTFRLIFVAFHGE~~P~~KT- 445  
 NuoLStreptomyces -----FYSKDKIIEAFAKG-GTEGWILGACALLGA~~AIT~~AYMTRV~~ML~~MTFFGEERWR 453  
 ND5Neurospora -----FYSKDFILESAYG-QFSFSGVAVYIIATIGAI~~FT~~TLYSVKVL~~YL~~TFLANPN~~GY~~ 440  
 ND5Yarrowia -----YYTKDIIIESTYG-SYSISNYVVYWIAYLSAVL~~TC~~VYSMKILY~~LT~~TFYSNPN-- 442  
 ND5Bovine -----FYSKDLIEAANTSYTNAWALLMT---LIATSFTAIYSTR~~I~~IFFALLGQPRFP 438  
 ND5Human -----FYSKDHIIETANMSYTNAWALSIT---LIATSLTSAYSTRMILL~~TL~~TGQPRFP 438

NuoLEcoli -----HAHAVKGVTHSL-PLIVLLLIL 463  
 Nqo12Thermus -----HHHPHEAPPVMLWPNHLLALG 452  
 Nqo12Paracoccus -----DHHAHDHAHESPPVMTIPLGVLAIG 481  
 NuoLRhodobacter -----DHHKHDHAHESPAVMLAPLALLAVG 487  
 NuoLPseudomonas -----EAHAGHGISHWL-PLSVLIVL 465  
 NuoLStreptomyces -----NAPTPSPAKPDVEPAEETRGTYEPPHPHESPLMTIPMIVLAVG 497  
 ND5Neurospora IHFYRHFILYERLYVYVSYTGKEEFYLPKHMSKEINNLRPSVSGEGGFLLSLPLVILALF 500  
 ND5Yarrowia -----NNTITYYNAHESNIYITLPMFILAIF 460  
 ND5Bovine -----TLVNINENNPLLINSIKRLLIG 460  
 ND5Human -----TLTNINENNPTLLNPIKRLAAG 460

▼

NuoLEcoli STFVGALIVPPLQG-----VLPQTTELAHG----- 488  
 Nqo12Thermus SVLAGYLALPHPL-----PNVLEPFLKPALAEV----- 480  
 Nqo12Paracoccus AVFAGMVWYGPFFGDHHKVT--EYFHIAGAHHEAAEGEE--AEHATAEAPVEHAVADTAT 537  
 NuoLRhodobacter SVLAGMVWYHSFFGD--KVA--SFFNLPAAAHEAHGTEHATEGHVPEAAMTAEAAHEAA 543  
 NuoLPseudomonas STFVGALITP-----PLAGVLPESVGHAGGE----- 491  
 NuoLStreptomyces SVGAGAFFSIG-----DRFMHWLEPITGHSHGD----- 525  
 ND5Neurospora SIFFGFITKDFIFIGLGSNFFIDNSLFIHPIHEIMIDTEF----- 539  
 ND5Yarrowia AMFAGWILKDIYLGVTDFVGT--HILPNNFSYFDTEF----- 504  
 ND5Bovine SLFAGYIISN-----NIPPTTIPQMTM----- 482  
 ND5Human SLFAGFLITN-----NISPPSPFQTT----- 481

NuoLEcoli -----SML-----TLEITSGVAVVVGILLAAWLWLGK 515  
 Nqo12Thermus -----EAHHLSLGA-----EWGLIALSAAVALLGLWAG- 508  
 Nqo12Paracoccus AEG---EAAAEAEHAEIAAPVGGAIYMHPDNHIMDEAHHAPAWVKVSPFVAMVLGLITAW 594  
 NuoLRhodobacter MAGTMAMAEPAAEHAVAKAPQG-AIFMAETNHVIHDAHGVPDWVKLSPFGAMVTGFFFAW 602  
 NuoLPseudomonas -----AKHS-----LELASGAIAGILLAALLFLGQ 518  
 NuoLStreptomyces -----S-----PISAGAVTGATVACMVIGVAVAWAQY 552  
 ND5Neurospora -----AV-----PTLFKLLPFIFTISFSLIALVLSEKY 567  
 ND5Yarrowia -----SITQFYKLLP-----LISAIVSILIVVLENEF 532  
 ND5Bovine -----PYYLKTALIVTILGFILALEISN 506  
 ND5Human -----IPLYLKLTAVALTFLGLLTALDLNY 506

▼ ▼

NuoLEcoli RTLVTSIANSAPGRLLGTWY----NAWGFWDLYDKVFKPFLGIAWLKRDPLNSMMN- 570  
 Nqo12Thermus FVFFQRKVFPAWYLAFEAASR----EAFYVDRAYNALIVNPLKALAEALFYGDRGLLSG- 563  
 Nqo12Paracoccus TFYIANPSLPRRLAAHEPALYRFLLNKWFDEIYEFIFVRPAKWLGRVLWKGGDGAVIDG 654  
 NuoLRhodobacter LYYIGDKPLPGRTARALPGLYRFLLNKWFDELFDLLFVNPAKSLGRKLWKGGDGAVIDG 662  
 NuoLPseudomonas RRFVSALAKSAPGRFFGTWY----HAWGFWDLYDKLFPYLLLCQLLGRDPIDRTL- 573  
 NuoLStreptomyces GRRPVPVAVAPR-GSLLTRAAR----RDLLQDDFNHVVLRGGEHLTRSLVYVDHTVV-DG 606  
 ND5Neurospora PNLVVHFKLSRLGYNLFGFFNQRFLLVLFYNYKITNLVLDLGGQITKILDKGSIELGPF 627  
 ND5Yarrowia A--IVFNLNKYYINTVYSIFNQKLVSQILNHFIIFKGLVTSNGIAHVVDKGSYLRLGPV 590  
 ND5Bovine MTKNLKYHYPSNAFKFSTLLG-----YFPTIMHRLAPYMNLSMSQKSASSLLDLIWL 559  
 ND5Human LTNKLMKKSPLCTFYFSNMLG-----FYPSITHRTIPYLGLLTSQNLPLLLLDLTWLE 559

|                  |                                                                                                  |     |
|------------------|--------------------------------------------------------------------------------------------------|-----|
| NuoLEcoli        | -IPAV--LSRFAGKG-LLLS <u>ENGYLRWYVASMSIGAVVVLALLMVL</u> R-----                                    | 613 |
| Nqo12Thermus     | -YFGLGGAARSLGQG-LARL <u>QTGYLRVYALLFVLGALLLLGVM</u> RW-----                                      | 606 |
| Nqo12Paracoccus  | T <u>INGVAMGLIPRLTRA</u> AVRV <u>QSGYLFHYAFAMVLGIVGLLIWVM</u> MARGAH-----                        | 703 |
| NuoLRhodobacter  | A <u>INGLALGWIPFFTR</u> VAGRI <u>QSGYLFHYAFAMVLGIVALMFV</u> VVRTGGMN-----                        | 712 |
| NuoLPseudomonas  | - <u>VVPF</u> --SVRGGHNL-LSLT <u>ENGRLRWYAASLV</u> GGAA <u>ILLGALL</u> LA-----                   | 615 |
| NuoLStreptomyces | - <u>VVNGTAASVGG</u> LSGRMRRL <u>QNGFARSYAVSMF</u> GGAA <u>LLVAATLLM</u> RAV-----                | 654 |
| ND5Neurospora    | <u>GLEKVLIKWSKDIAS</u> LSSTS <u>IVTNYALFILVGFILYVFTFIS</u> LLEGGLDLNLSL <u>FILL</u> LSL          | 687 |
| ND5Yarrowia      | <u>G</u> INRLLNKASYNVINLSSNTR <u>SS</u> ----LSMNSML <u>LILITIVS</u> LLLLVLVMNVNFI <u>IIVIPVL</u> | 646 |
| ND5Bovine        | A <u>ILP</u> KTISLAQMKA <u>STLVTN</u> <u>QKGLIKLYFLSFLITILIS</u> MILFN <u>FHE</u> -----          | 606 |
| ND5Human         | <u>KLLP</u> KTISQHQISTSIITST <u>QKGMIKLYFLSFFFPLILIT</u> LLLLIT-----                             | 603 |
|                  |                                                                                                  |     |
| NuoLEcoli        | -----                                                                                            |     |
| Nqo12Thermus     | -----                                                                                            |     |
| Nqo12Paracoccus  | -----                                                                                            |     |
| NuoLRhodobacter  | -----                                                                                            |     |
| NuoLPseudomonas  | -----                                                                                            |     |
| NuoLStreptomyces | -----                                                                                            |     |
| ND5Neurospora    | TSSTSSSDSKEGKMIKKAVVSTKNKNIR                                                                     | 715 |
| ND5Yarrowia      | <u>IS</u> ----- <u>ILYILFS</u> -----                                                             | 655 |
| ND5Bovine        | -----                                                                                            |     |
| ND5Human         | -----                                                                                            |     |

**Supplemental Figure 1. Comparison of the amino acid sequence of *E. coli* NuoL subunit with its homologs.** The totally conserved residues are shown in red letters, while blue letters indicate residues conserved in almost 60% of the cases. Amino acids that are conserved in almost 50% of the cases or the residues having similar characteristics in about 80% of the cases are shown in green letters. Yellow shadows indicate the predicted transmembrane helices. Potential transmembrane helices are underlined. Red arrows indicate residues mutated for a STOP codon. Green arrows point at the location where the HL helix was truncated in the  $\Delta$ V519-K581 mutant. Sequence sources and their accession numbers are: NuoLEcoli: *Escherichia coli* K-12 [P33607], Nqo12Thermus: *Thermus thermophilus* [Q56227], Nqo12Paracoccus: *Paracoccus denitrificans* [P29924], NuoLRhodobacter: *Rhodobacter capsulatus* [P50939] NuoLPseudomonas: *Pseudomonas aeruginosa* [15597843], NuoLStreptomyces: *Streptomyces coelicolor* A3 [21222956], ND5Neurospora: *Neurospora crassa* [1171827], ND5Yarrowia: *Yarrowia lipolytica* [Q9B6D3], ND5Bovine: *Bovis taurus* [28381381], ND5Human: *Homo sapiens* [P03915].
